# Supplementary material for: RavN is a member of a previously unrecognized group of Legionella pneumophila E3 ubiquitin ligases
Source: PubMed Central journal article supplement (PMC5819833; doi:10.1371/journal.ppat.1006897), 2018-02-07
Supplement: ppat.1006897.s010.pdf [file ppat.1006897.s010.pdf]

**Table S1. Plasmids used in this study.**

| Name                                             | Properties                                                                           | Source     |
|--------------------------------------------------|--------------------------------------------------------------------------------------|------------|
| <i>E. coli</i>                                   |                                                                                      |            |
| pDEST17                                          | Gateway™ destination vector generating an N-terminal His <sub>6</sub> tag            | Invitrogen |
| pDEST17-ravN                                     | <i>ravN</i> in pDEST17                                                               | This study |
| pDEST17-ravI                                     | <i>ravI</i> in pDEST17                                                               | This study |
| pDEST17-ankJ                                     | <i>ankJ</i> in pDEST17                                                               | This study |
| pDEST17-lpg2452                                  | <i>lpg2452</i> in pDEST17                                                            | This study |
| pDEST17-lpg2452 <sup>C57A</sup>                  | pDEST17-lpg2452 with mutation C57A                                                   | This study |
| pDEST17-lpg2452 <sup>H426A</sup>                 | pDEST17-lpg2452 with mutation H426A                                                  | This study |
| pDEST17-lpg2452 <sup>D428A</sup>                 | pDEST17-lpg2452 with mutation D428A                                                  | This study |
| pGEX-6p-1                                        | <i>E. coli</i> expression vector generating an N-terminal GST fusion                 | GE         |
| pGEX-6p-1-ravN                                   | <i>ravN</i> in pGEX-6p-1                                                             | This study |
| pGEX-6p-1-ravN <sub>1-100</sub>                  | <i>ravN</i> residues 1-100 in pGEX-6p-1                                              | This study |
| pGEX-6p-1-ravN <sub>1-140</sub>                  | <i>ravN</i> residues 1-140 in pGEX-6p-1                                              | This study |
| pGEX-6p-1-ravN <sub>101-212</sub>                | <i>ravN</i> residues 101-212 in pGEX-6p-1                                            | This study |
| pGEX-6p-1-ravN <sub>141-212</sub>                | <i>ravN</i> residues 141-212 in pGEX-6p-1                                            | This study |
| pGEX-6p-1-ravN <sub>1-110</sub>                  | <i>ravN</i> residues 1-110 in pGEX-6p-1                                              | This study |
| pGEX-6p-1-ravN <sub>1-120</sub>                  | <i>ravN</i> residues 1-120 in pGEX-6p-1                                              | This study |
| pGEX-6p-1-ravN <sub>1-123</sub>                  | <i>ravN</i> residues 1-123 in pGEX-6p-1                                              | This study |
| pGEX-6p-1-ravN <sub>1-130</sub>                  | <i>ravN</i> residues 1-130 in pGEX-6p-1                                              | This study |
| pGEX-6p-1-ravN <sup>I8S</sup>                    | pGEX-6p-1-ravN with mutation I8S                                                     | This study |
| pGEX-6p-1-ravN <sup>L43S</sup>                   | pGEX-6p-1-ravN with mutation L43S                                                    | This study |
| pGEX-6p-1-ravN <sup>P47S</sup>                   | pGEX-6p-1-ravN with mutation P47S                                                    | This study |
| pGEX-6p-1-ravN <sup>L43S/P47S</sup>              | pGEX-6p-1-ravN with mutations L43S, P47S                                             | This study |
| pGEX-6p-1-ravN <sup>I8S/L43S/P47S</sup>          | pGEX-6p-1-ravN with mutations I8S, L43S, P47S                                        | This study |
| pGEX-6p-1-ravN <sup>L43S/P47S/K101A</sup>        | pGEX-6p-1-ravN with mutations L43S, P47S, K101A                                      | This study |
| pGEX-6p-1-ravN <sup>L43S/P47S/Q102A</sup>        | pGEX-6p-1-ravN with mutations L43S, P47S, Q102A                                      | This study |
| pGEX-6p-1-ravN <sup>L43S/P47S/F103A</sup>        | pGEX-6p-1-ravN with mutations L43S, P47S, F103A                                      | This study |
| pGEX-6p-1-ravN <sup>L43S/P47S/S104A</sup>        | pGEX-6p-1-ravN with mutations L43S, P47S, S104A                                      | This study |
| pGEX-6p-1-ravN <sup>L43S/P47S/D105A</sup>        | pGEX-6p-1-ravN with mutations L43S, P47S, D105A                                      | This study |
| pGEX-6p-1-ravN <sup>L43S/P47S/S106A</sup>        | pGEX-6p-1-ravN with mutations L43S, P47S, S106A                                      | This study |
| pGEX-6p-1-ravN <sup>L43S/P47S/V107A</sup>        | pGEX-6p-1-ravN with mutations L43S, P47S, V107A                                      | This study |
| pGEX-6p-1-ravN <sup>L43S/P47S/K108A</sup>        | pGEX-6p-1-ravN with mutations L43S, P47S, K108A                                      | This study |
| pGEX-6p-1-ravN <sup>L43S/P47S/R109A</sup>        | pGEX-6p-1-ravN with mutations L43S, P47S, R109A                                      | This study |
| pGEX-6p-1-ravN <sup>L43S/P47S/E110A</sup>        | pGEX-6p-1-ravN with mutations L43S, P47S, E110A                                      | This study |
| pGEX-6p-1-ravN <sup>F103A</sup>                  | pGEX-6p-1-ravN with mutation F103A                                                   | This study |
| pGST-Parallel2-ravN                              | <i>ravN</i> in pGST-Parallel2                                                        | This study |
| pGST-Parallel2-ravN <sub>1-123</sub>             | <i>ravN</i> residues 1-123 in pGST-Parallel2                                         | This study |
| <i>S. cerevisiae</i>                             |                                                                                      |            |
| pYES2/NTA                                        | <i>S. cerevisiae</i> expression vector containing the <i>URA3</i> gene and 2μ origin | Invitrogen |
| pYES2-ravN                                       | <i>ravN</i> in pYES2/NTA                                                             | This study |
| pYES2-ravN <sup>I8S</sup>                        | pYES2-ravN with mutation I8S                                                         | This study |
| pYES2-ravN <sup>L43S</sup>                       | pYES2-ravN with mutation L43S                                                        | This study |
| pYES2-ravN <sup>P47S</sup>                       | pYES2-ravN with mutation P47S                                                        | This study |
| pYES2-ravN <sup>L43S/P47S</sup>                  | pYES2-ravN with mutations L43S, P47S                                                 | This study |
| pYES2-ravN <sup>I8S/L43S/P47S</sup>              | pYES2-ravN with mutations I8S, L43S, P47S                                            | This study |
| Mammalian cultured cells                         |                                                                                      |            |
| pRK5-HA-Ubiquitin                                | Mammalian expression of HA tagged ubiquitin                                          | Addgene    |
| pcDNA5/FRO/TO                                    | Inducible expression vector used in Flp-In™ T-Rex™ host cell lines                   | Invitrogen |
| pcDNA5/FRO/TO-FLAG-ravN                          | <i>ravN</i> with a N-terminal single FLAG tag in pcDNA5/FRO/TO                       | This study |
| pcDNA5/FRO/TO-FLAG-ravN <sup>I8S</sup>           | pcDNA5/FRO/TO-FLAG-ravN with mutation I8S                                            | This study |
| pcDNA5/FRO/TO-FLAG-ravN <sup>L43S/P47S</sup>     | pcDNA5/FRO/TO-FLAG-ravN with mutations L43S, P47S                                    | This study |
| pcDNA5/FRO/TO-FLAG-ravN <sup>I8S/L43S/P47S</sup> | pcDNA5/FRO/TO-FLAG-ravN with mutations I8S, L43S, P47S                               | This study |
| pcDNA6.2-FLAG                                    | pcDNA6.2-EmGFP with <i>emgfp</i> sequence replaced by a single FLAG tag sequence     | This study |
| pcDNA6.2-FLAG-lpg2370                            | <i>lpg2370</i> in pcDNA6.2-FLAG                                                      | This study |
| pcDNA6.2-FLAG-lpg2452                            | <i>lpg2452</i> in pcDNA6.2-FLAG                                                      | This study |
| pcDNA6.2-FLAG-lpg2498                            | <i>lpg2498</i> in pcDNA6.2-FLAG                                                      | This study |

|                       |                                                                  |            |
|-----------------------|------------------------------------------------------------------|------------|
| pcDNA6.2-FLAG-lpg2577 | <i>lpg2577</i> in pcDNA6.2-FLAG                                  | This study |
| pcDNA6.2/N-EmGFP-DEST | Gateway destination vector generating an N-terminal EmGFP fusion | Invitrogen |
| pcDNA6.2/N-EmGFP-ravN | <i>ravN</i> in pcDNA6.2/N-EmGFP-DEST                             | This study |
| <i>Legionella</i>     |                                                                  |            |
| pSR47S                | R6K suicide vector (Kan <sup>r</sup> <i>sacB</i> )               | [1]        |
| pSR47S-ΔravN          | pSR47S containing flanking regions of <i>ravN</i>                | This study |

---

1. Merriam JJ, Mathur R, Maxfield-Boumil R, Isberg RR. Analysis of the *Legionella pneumophila* *fliI* gene: intracellular growth of a defined mutant defective for flagellum biosynthesis. *Infection and Immunity*. 1997;65(6):2497-501.
