# Supplementary material for: RavN is a member of a previously unrecognized group of Legionella pneumophila E3 ubiquitin ligases
Source: PubMed Central journal article supplement (PMC5819833; doi:10.1371/journal.ppat.1006897), 2018-02-07
Supplement: ppat.1006897.s011.pdf [file ppat.1006897.s011.pdf]

**Table S2. Oligonucleotides used in this study.**

| <b>Name</b>                 | <b>Sequence (5'→3', <b>bold</b>: nucleotide substitutions; <u>underlined</u>: restriction enzyme site; <i>italic</i>: FLAG tag)</b> | <b>Purpose</b>  |
|-----------------------------|-------------------------------------------------------------------------------------------------------------------------------------|-----------------|
| Sall_ravN_upst_for          | AAAAGT <u>TCGACTT</u> CAGCTGATAATTGGTTACTTTCATA                                                                                     | pSR47S          |
| SacI_ravN_down_rev          | AAAAG <u>AGCTCGT</u> GCATCGCCAGCACTTCTGCAT                                                                                          | pSR47S          |
| ΔravN_for                   | GTAATACAGGTTGGGTTTAATGTGAAGTTGGCATAATAATAGTC<br>CTTTAGC                                                                             | pSR47S          |
| ΔravN_rev                   | GCTAAAGGACTATTATTATGCCAACTTCACATTAACCCCAACCT<br>GTATTAC                                                                             | pSR47S          |
| BglII_ravN_for              | AAAGATCTCCAACCTATTTTTGATCCTATTAT                                                                                                    | pGEX-6p-1       |
| Sall_ravN_rev               | AAGT <u>TCGACTT</u> AATGTGAGTGCCATGAGTA                                                                                             | pGEX-6p-1       |
| HindIII_FLAG_TEV_ravN_for_a | GAAAACTGTATTTTCAGGGCGGCAGCGGCCCAACTATTTTTGA<br>TCCTATTAT                                                                            | pcDNA5/FRO/TO   |
| HindIII_FLAG_TEV_ravN_for_b | AAAAGCTT <u>GCCATGGACTACAAGGACGACGATGACAAAGGCAGCG</u><br>GCGAAAACTGTATTTTCAGGGC                                                     | pcDNA5/FRO/TO   |
| XhoI_ravN_rev               | AACTCGAGTTAATGTGAGTGCCATGAGTA                                                                                                       | pcDNA5/FRO/TO   |
| GST-ravN-BamHI_for          | TCCGGAGGATCCATGCCAACTTATTTGATCCTATTATGCAAGAAGATAC                                                                                   | Crystallization |
| GST-ravN-XhoI_rev           | TCCGGACTCGAGTCAAATGTGAGTGCCATGAGTATGCTCGC                                                                                           | Crystallization |
| GST-ravN-XhoI-123_rev       | TCCGGACTCGAGTCAATTGATCCTGTAGTACCTCTCGTGCC                                                                                           | Crystallization |
| RavN_100_stop_BglII_for     | GATAAGACTGAACCCTAAAGATCTAAGCAATTTAGTGAC                                                                                             | SD              |
| RavN_100_stop_BglII_rev     | GTCACTAAATTGCTTAGATCTTTAGGGTTTCAGTCTTATC                                                                                            | SD              |
| RavN_140_stop_BglII_for     | TATCAACCCTATTCTAAAGATCTATCCATGGGCATCAT                                                                                              | SD              |
| RavN_140_stop_BglII_rev     | ATGATGCCCATGGATAGATCTTTAGAATAGGGGTTGATA                                                                                             | SD              |
| RavN_110_stop_BglII_for     | TCCGTTAAGAGAGAGTAAAGATCTTTAACTGAAAACCTGG                                                                                            | SD              |
| RavN_110_stop_BglII_rev     | CCAGTTTTTCAGTTAAAGATCTTTACTCTCTCTTAACGGA                                                                                            | SD              |
| RavN_120_stop_BglII_for     | GCACGAGAGGTACTATAAAGATCTCAGGATCAATTTGCT                                                                                             | SD              |
| RavN_120_stop_BglII_rev     | AGCAAATTGATCCTGAGATCTTTATAGTACCTCTCGTGC                                                                                             | SD              |
| RavN_123_stop_BglII_for     | GTACTACAGGATCAATAAAGATCTTTTGCTCATGCAGGG                                                                                             | SD              |
| RavN_123_stop_BglII_rev     | CCCTGCATGAGCAAAAAGATCTTTATGATCCTGTAGTAC                                                                                             | SD              |
| RavN_130_stop_BglII_for     | CATGCAGGGCAAAACTAAAGATCTCCTCATTTCTTTTT                                                                                              | SD              |
| RavN_130_stop_BglII_rev     | AAAAAAGAAATGAGGAGATCTTTAGTTTTGCCCTGCATG                                                                                             | SD              |
| RavN(I8S)_for               | CTTATTTTGATCCTAGTATGCAAGAAGATAC                                                                                                     | SD              |
| RavN(I8S)_rev               | GTATCTTCTTGCATACTAGGATCAAAAATAAG                                                                                                    | SD              |
| RavN(L43S)_for              | GGATTGGAGCACAGCCCCAGTGATCCAAC                                                                                                       | SD              |
| RavN(L43S)_rev              | GTTGGATCACTGGGGCTGTGCTCCAATCC                                                                                                       | SD              |
| RavN(P47S)_for              | CTCCCCAGTGATCAACTACTCACGCGGAG                                                                                                       | SD              |
| RavN(P47S)_rev              | CTCCGCGTGAGTAGTTGAATCACTGGGGAG                                                                                                      | SD              |
| RavN(L43S/P47S)_for         | GGATTGGAGCACAGCCCCAGTGATCAACTACTCACGCGGAG                                                                                           | SD              |
| RavN(L43S/P47S)_rev         | CTCCGCGTGAGTAGTTGAATCACTGGGGCTGTGCTCCAATCC                                                                                          | SD              |
| RavN(K101A)_for             | AGACTGAACCCGCGCAATTTAGTGAC                                                                                                          | SD              |
| RavN(K101A)_rev             | GTCACTAAATTGCGCGGGTTCAGTCT                                                                                                          | SD              |
| RavN(Q102A)_for             | CTGAACCCAAGGCATTTAGTGAC                                                                                                             | SD              |
| RavN(Q102A)_rev             | GTCACTAAATGCCTTGGGTTTCAG                                                                                                            | SD              |
| RavN(F103A)_for             | CTGAACCCAAGCAAGCTAGTGACTCCG                                                                                                         | SD              |
| RavN(F103A)_rev             | CGGAGTCACTAGCTTGCTTGGGTTTCAG                                                                                                        | SD              |
| RavN(S104A)_for             | CCCAAGCAATTTGCTGACTCCGTTAAG                                                                                                         | SD              |
| RavN(S104A)_rev             | CTTAACGGAGTCAGCAAATTTGCTTGGG                                                                                                        | SD              |
| RavN(D105A)_for             | CCCAAGCAATTTAGTGCTCCTCCGTTAAG                                                                                                       | SD              |
| RavN(D105A)_rev             | CTTAACGGAGGCACTAAATTTGCTTGGG                                                                                                        | SD              |
| RavN(S106A)_for             | CCCAAGCAATTTAGTGACGCCGTTAAG                                                                                                         | SD              |
| RavN(S106A)_rev             | CTTAACGGCGTCACTAAATTTGCTTGGG                                                                                                        | SD              |
| RavN(V107A)_for             | GCAATTTAGTGACTCCGCTAAGAGAGAG                                                                                                        | SD              |
| RavN(V107A)_rev             | CTCTCTTAGCGGAGTCACTAAATTTGC                                                                                                         | SD              |
| RavN(K108A)_for             | GCAATTTAGTGACTCCGTTGCGAGAGAG                                                                                                        | SD              |
| RavN(K108A)_rev             | CTCTCTCGCAACCGGACTCAATAATTTGC                                                                                                       | SD              |
| RavN(R109A)_for             | GTGACTCCGTTAAGGCAGAGTTAACTG                                                                                                         | SD              |
| RavN(R109A)_rev             | CAGTTAACTCTGCCTTAACGGAGTCAC                                                                                                         | SD              |
| RavN(E110A)_for             | GTGACTCCGTTAAGAGAGCGTTAACTG                                                                                                         | SD              |
| RavN(E110A)_rev             | CAGTTAACGCTCTCTTAACGGAGTCAC                                                                                                         | SD              |
| BamHI_AG_RavN_for           | AAAAGGATCCAGATGCCAACTTATTTTGATCCTATTATGC                                                                                            | pYES2/NTA       |

|                            |                                                       |               |
|----------------------------|-------------------------------------------------------|---------------|
| XbaI_RavN_rev              | TTTTTCTAGATTAATGTGAGTGTCCATGAGTATGCTCG                | pYES2/NTA     |
| 5'P_EcoRV_FLAG_PspXI_sense | <u>ATCCTCGAGACCATGGATTACAAGGATGACGATGACAAGGGC</u>     | pcDNA6.2-FLAG |
| 5'P_EcoRV_FLAG_PspXI_anti  | <u>TCGAGCCCTTGTCATCGTCATCCTTGTAATCCATGGTCTCGAGGAT</u> | pcDNA6.2-FLAG |
| Lpg2452_C57A_for           | GGCGATAATACGGCCAAATCGGATTTAGAAAAG                     | SD            |
| Lpg2452_C57A_rev           | CTTTCTAAATCCGATTTGGCCGTATTATCGCC                      | SD            |
| Lpg2452_H426A_for          | GATGCTGAAGCTTTTGATGAACTAAGAATAG                       | SD            |
| Lpg2452_H426A_rev          | CTATTCTTAGTTCATCAAAAAGCTTCAGCATC                      | SD            |
| Lpg2452_D428A_for          | GATGCTGAACATTTTGCTGAACTAAGAATAG                       | SD            |
| Lpg2452_D428A_rev          | CTATTCTTAGTTCAGCAAAATGTTTCAGCATC                      | SD            |

---

SD, site-directed mutagenesis
